# Supplementary material for: Innovative self-sterilizing transparent Fe–phosphate polyethylene films under visible light
Source: Royal Society of Chemistry journal article supplement (doi:10.1039/c6ra15881a), 2016-01-01
Supplement: c6ra15881a1.pdf [file c6ra15881a1.pdf]

RSC-Advances, 2016

## Innovative self-sterilizing transparent Fe-phosphate polyethylene films under visible light.

Sami Rtimi <sup>1</sup>, Alexander Gulin <sup>2</sup>, Rosendo Sanjines <sup>3</sup>, Cesar Pulgarin <sup>1</sup>, Victor Nadtochenko <sup>4</sup>, John Kiwi <sup>1</sup>

### Supplementary Material

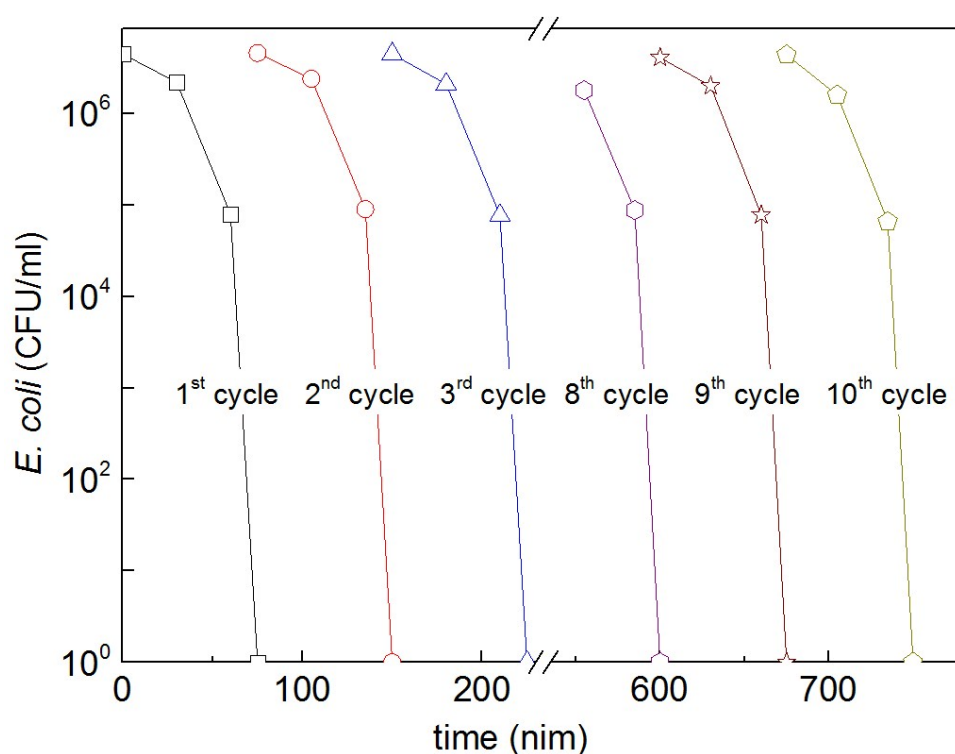

**S1.** Recycling of FeOx-POxHD-PET up to 10 bacterial inactivation cycles. After each cycle the sputtered fabric was washed with distilled water and 1M NaOH. For more details see text.

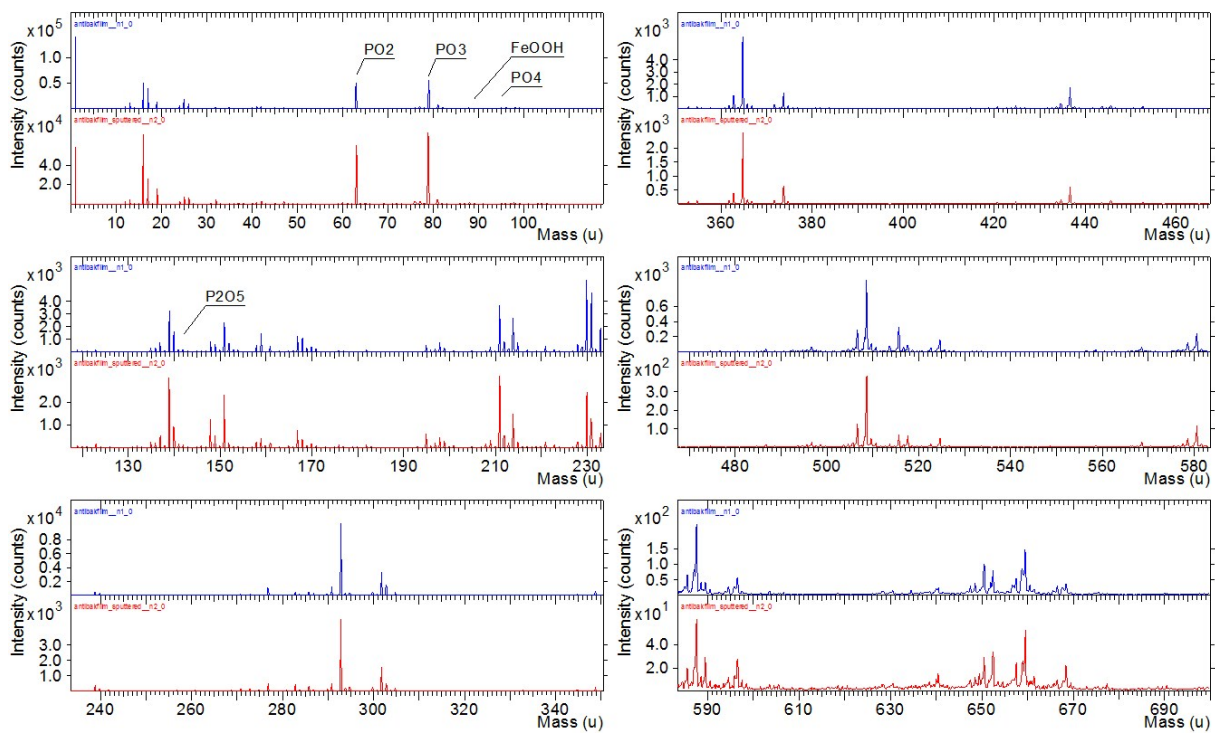

Mass spectrometry (TOF-MS) of negatively charged ions on the surface of FeO<sub>x</sub>-PO<sub>x</sub>-HDPET

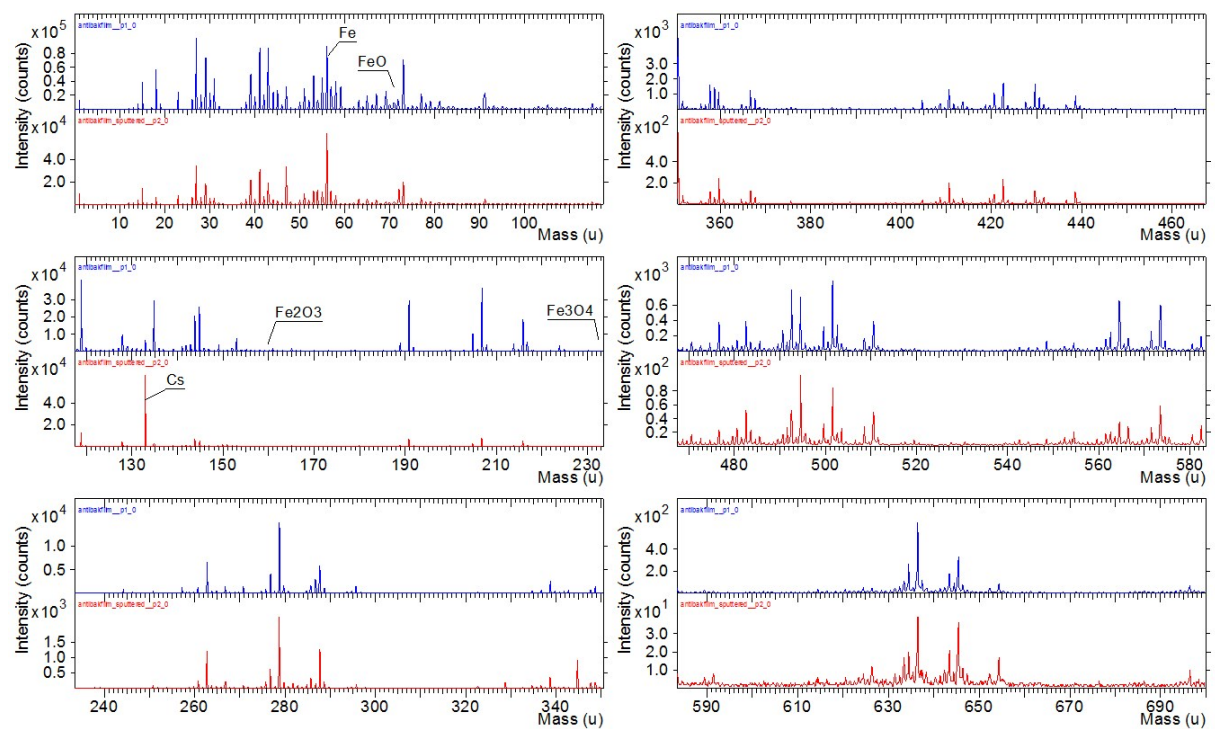

**S2:** Mass spectrometry (TOF-MS) of positively charged ions on the surface of FeO<sub>x</sub>-PO<sub>x</sub>-HDPET
